# Supplementary material for: The chromatin-binding protein PHF6 functions as an E3 ubiquitin ligase of H2BK120 via H2BK12Ac recognition for activation of trophectodermal genes
Source: PubMed Central journal article supplement — Nucleic Acids Res. 2020 Jul 31;48(16):9037–52. doi: 10.1093/nar/gkaa626 (PMC7498345; doi:10.1093/nar/gkaa626), 2020-07-31
Supplement: gkaa626_supplemental_file.pdf [file gkaa626_supplemental_file.pdf]

**SUPPLEMENTARY DATA**

**Supplementary Table S1. List of primers used in this study**

| <b>qRT-PCR primers</b>   |                           |                                  |
|--------------------------|---------------------------|----------------------------------|
| <b>Gene name</b>         | <b>Primer information</b> | <b>Primer sequence</b>           |
| <i>Phf6</i>              | Forward                   | 5'-TCTGTAGGGAGCACCGACAAT-3'      |
|                          | Reverse                   | 5'-TCTGTAGGGAGCACCGACAAT-3'      |
| <i>Cdx2</i>              | Forward                   | 5'-CAAGGACGTGAGCATGTATCC-3'      |
|                          | Reverse                   | 5'-GTAACCACCGTAGTCCGGGTA-3'      |
| <i>Oct4</i>              | Forward                   | 5'-AGAGG ATCACCTTGGGGTACA-3'     |
|                          | Reverse                   | 5'-CGAAGCGACAGATGGTGGTC-3'       |
| <i>Tbx3</i>              | Forward                   | 5'-GAACCTACCTGTTCCCGGAAA-3'      |
|                          | Reverse                   | 5'-CCATTGCCAGTGTCTCGAAAAC-3'     |
| <i>Klf5</i>              | Forward                   | 5'-CCGGAGACGATCTGAAACAC-3'       |
|                          | Reverse                   | 5'-CAGATACTTCTCCATTTACATCTTG-3'  |
| <i>Plac1</i>             | Forward                   | 5'-CTTCAGCTACTCGGAGCAAAA-3'      |
|                          | Reverse                   | 5'-GTGAACATGATTGGGAGGGC-3'       |
| <i>Ascl2</i>             | Forward                   | 5'-TCCTGGTGGACCTACCTGCTT-3'      |
|                          | Reverse                   | 5'-AGGTCAGTCAGCACTTGGCATT-3'     |
| <i>Gata2</i>             | Forward                   | 5'-CCTCCAGCTTCACCCCTAA-3'        |
|                          | Reverse                   | 5'-CAGAGAGGGGTGGCTGTG-3'         |
| <i>Wnt7b</i>             | Forward                   | 5'-GGAGAAGCAAGGCTACTACAACCAGG-3' |
|                          | Reverse                   | 5'-GCATCCACAAAGCGACGAGAAAA-3'    |
| <i>Fgfr2</i>             | Forward                   | 5'-CCACATTCAAGCAGTTGGTC-3'       |
|                          | Reverse                   | 5'-TTGTGTCGGGGTAAGTAGGAG-3'      |
| <i>Esx1</i>              | Forward                   | 5'-TTGGAGGGAGCAGACTACCAG-3'      |
|                          | Reverse                   | 5'-CCAAAGTCGGAGTAGAAAGTTGT-3'    |
| <i>Gapdh</i>             | Forward                   | 5'-CATGGCCTTCCGTGTTTCTTA-3'      |
|                          | Reverse                   | 5'-CCTGCTTACCACCTTCTTGA-3'       |
| <i>β-actin</i>           | Forward                   | 5'-TAGCCATCCAGGCTGTGCTG-3'       |
|                          | Reverse                   | 5'-CAGGATCTTCATGAGGTAGTC-3'      |
| <b>ChIP-qPCR primers</b> |                           |                                  |
| <b>Gene name</b>         | <b>Primer information</b> | <b>Primer sequence</b>           |
| <i>Cdx2</i> promoter     | Forward                   | 5'-TCAACGTTTGTCCCCAGACA-3'       |
|                          | Reverse                   | 5'-ACGTCCTTGTCCAGAAGGTAGCT-3'    |
| <i>Gata2</i> promoter    | Forward                   | 5'-GTTGTCCAGCGGATCCTACC-3'       |
|                          | Reverse                   | 5'-ACGTGCACCTTCTGGGTATC-3'       |
| <i>Msx2</i> promoter     | Forward                   | 5'-TGTTAACACCCGTTCCCCAG-3'       |
|                          | Reverse                   | 5'-ATACAGGAGCCCGGCAGATA-3'       |
| <i>Klf6</i> promoter     | Forward                   | 5'-TGGCATAGTCTCCATGCTTCC-3'      |
|                          | Reverse                   | 5'-TTTTCGGGTACTGGGCTCTG-3'       |

Supplementary Data are available at NAR online.
